1  
2  
3  
4  
5  
6  
7  
8  
9  
10  
11  
12  
13  
14  
15  
16  
17  
18  
19  
20  
21  
22  
23  
24  
25  
26  
27  
28  
29  
30  
31  
32  
33  
34  
35  
36  
37  
38  
39  
40  
41  
42  
43  
44  
45

# Cell shape independent FtsZ dynamics in synthetically remodeled cells

**Short title: FtsZ dynamics in shapes**

Bill Söderström<sup>1\*\$</sup>, Alexander Badrutdinov<sup>2</sup>,  
Helena Chan<sup>1</sup>, and Ulf Skoglund<sup>1</sup>

<sup>1</sup>Structural Cellular Biology Unit

<sup>2</sup> Mechanical Engineering and Microfabrication Support Section  
Okinawa Institute of Science and Technology, 904-0495 Okinawa, Japan

\* Address correspondence to:

Mail [Bill.soederstroem@oist.jp](mailto:Bill.soederstroem@oist.jp) or [soderstrombill@gmail.com](mailto:soderstrombill@gmail.com),

Tel: +81 080-6483-7515, Fax : +81 098-982-3420

\$ Twitter: [@BillSoderstrom](https://twitter.com/BillSoderstrom)

Key words: FtsZ, Micron pillars, STED, Z-square, Z-heart

46 **Abstract**

47 The FtsZ protein is a key regulator of bacterial cell division. It has been implicated in  
48 acting as a scaffolding protein for other division proteins, being a force generator  
49 during constriction, and more recently, as an active regulator of septal cell wall  
50 production. During an early stage of the division cycle, FtsZ assembles into a  
51 heterogeneous structure coined the “Z-ring” due to its resemblance to a ring confined  
52 by the midcell geometry. While *in vitro* experiments on supported lipid bilayers have  
53 shown that purified FtsZ can self-organize into a swirling ring roughly the diameter of  
54 a bacterial cell, it is not known how, and if, membrane curvature affects FtsZ assembly  
55 and dynamics *in vivo*.

56 To establish a framework for examining geometrical influences on proper Z-ring  
57 assembly and dynamics, we sculptured *Escherichia coli* cells into unnatural shapes,  
58 such as squares and hearts, using division- and cell wall-specific inhibitors in a micro  
59 fabrication scheme. This approach allowed us to examine FtsZ behavior in engineered  
60 “Z-squares” and “Z-hearts”, and in giant cells up to 50 times their normal volume.  
61 Quantification of super-resolution STimulated Emission Depletion (STED) nanoscopy  
62 data showed that FtsZ densities in sculptured cells maintained the same dimensions  
63 as their wild-type counterparts. Additionally, time-resolved fluorescence  
64 measurements revealed that FtsZ dynamics were generally conserved in a wide range  
65 of cell shapes. Based on our results, we conclude that the underlying membrane  
66 environment is not a deciding factor for FtsZ filament maintenance and treadmilling *in*  
67 *vivo*.

68

## 69 Introduction

70 Most bacterial cells divide by binary fission, whereby one mother cell splits into two  
71 identical daughters<sup>1-3</sup>. Decades of study have led to a detailed understanding of how  
72 the cell division machinery, the divisome, carries out this task during the later stages  
73 of the cell cycle<sup>4,5</sup>. At the heart of this process is the eukaryotic tubulin homologue,  
74 FtsZ<sup>6</sup> that, together with its membrane anchors ZipA and FtsA, forms an intermediate  
75 structure called the proto-ring (Fig. 1a)<sup>7</sup>. Functioning as a recruitment base, the proto-  
76 ring components then enlist the remaining essential division proteins to form a mature  
77 'divisome'<sup>5</sup>. As soon as it is fully assembled, the divisome starts to constrict the cell  
78 envelope by reshaping the septal geometry, ultimately leading to sequential closure of  
79 the inner and outer membranes<sup>8-10</sup>.

80 In rod-shaped model bacteria such as *Escherichia coli* and *Bacillus subtilis*, FtsZ is  
81 believed to organize into short bundles of filaments, roughly 100 nm in length<sup>11,12</sup>, that  
82 treadmill at the septum with a circumferential velocity in the order of 20-30 nm/s<sup>13-15</sup>.  
83 The treading filaments guide and regulate septal peptidoglycan (PG-) production  
84 and ingrowth, leading up to septation<sup>16</sup>. This mode of action may be limited to rod-  
85 shaped bacteria that have two separate PG-machineries, as opposed to cocci, which  
86 have only one PG-machinery that is capable of finalizing division in cells with inhibited  
87 FtsZ dynamics<sup>17</sup>.

88 At a late stage of membrane constriction, but prior to inner membrane fusion, FtsZ  
89 disassembles from midcell, indicating the possible existence of an upper limit of ring  
90 curvature<sup>6,9</sup>. However, other geometrical constraints that might govern Z-ring  
91 maintenance and stability are currently unclear. We were curious as to whether  
92 geometrical changes to cell shape would influence Z-ring formation and dynamics. In

93 this study, we examined FtsZ formation, organization and behavior in *E. coli* cells that  
94 were sculptured into complex geometrical shapes in micron sized holes.

95

## 96 **Results**

97 *FtsZ structure and dynamics in Z-rings are not sensitive to increased ring size*

98 As a reference for unmodified division rings, we imaged Z-rings in *E. coli* cells  
99 expressing FtsZ-mNeonGreen as the only source of FtsZ<sup>18</sup>. Under our experimental  
100 conditions, this strain produced normal-looking, sharp Z-rings ([Supplementary Fig. S1](#))  
101 and grew and divided similarly to wild-type (WT) *E. coli* (MC4100) ([Supplementary Fig.](#)  
102 [S2a-e](#)). We then trapped the cells in a vertical position in micron-sized holes that were  
103 produced in agarose pads using silica micron pillar arrays<sup>14</sup> ([Fig. 1b](#), [Supplementary](#)  
104 [Fig. S3](#)), and imaged the cells using super-resolution time-gated Stimulated Emission  
105 Depletion (gSTED) nanoscopy. In these standing cells, a heterogeneous Z-ring with  
106 distinct FtsZ-mNeonGreen densities was clearly seen traversing the circumference of  
107 the cell ([Fig. 1c](#)), similar to what has been observed before<sup>12,14</sup>.

108 Previous work has shown that FtsZ densities generally maintain the same length  
109 throughout envelope constriction<sup>12,14</sup>. We wanted to see if this was also true for cells  
110 growing in the opposite direction, *i.e.* would FtsZ densities maintain the same  
111 dimensions in Z-rings of cells with increased diameter at midcell? In order to increase  
112 cell diameter, we treated *E. coli* cells with A22 and cephalixin (hereafter collectively  
113 referred to as 'drugs'), in a way similar to what has previously proven successful for  
114 cell shape manipulations<sup>19</sup>. A22 disrupts MreB dynamics and therefore perturbs the  
115 characteristic rod-shape of *E. coli* cells<sup>20,21</sup>, while cephalixin blocks cell division by  
116 inhibiting the transpeptidase activity of FtsI<sup>22</sup>. The net effect of this dual drug treatment

117 is the growth of cells into shapeable blebs that are unable to divide ([Supplementary](#)  
118 [Fig. S4a](#)).

119 As long as cell width remains less than cell length, FtsZ molecules should be directed  
120 to midcell by the Min system <sup>19</sup>, such that a ring-like structure should be observed in  
121 the xy-plane of vertically-oriented, standing cells ([Fig. 1b](#)). To confirm this, we exposed  
122 *E. coli* cells expressing FtsZ-mNeonGreen to drugs, and then trapped the cells  
123 vertically in holes with a depth of 4.5 - 6  $\mu\text{m}$ , and a diameter of up to 3.5  $\mu\text{m}$ . Depending  
124 on the size of the holes, cells were incubated between 120 and 240 minutes prior to  
125 imaging; over-incubation resulted in cells that outgrew the holes ([Supplementary Fig.](#)  
126 [S4b](#). Letting cells grow for long time (> 10 h) produced giant blobs with internalized  
127 FtsZ-mNeonGreen chain, see [SI Text](#)). We found “normal-looking” Z-rings that  
128 spanned the midcell circumference for the entire range of cell diameters that were  
129 imaged ( $\sim 1 - 3 \mu\text{m}$ ) ([Fig. 1d-e](#)). Importantly, confocal Z-stacks showed that each cell  
130 contained only one Z-ring ([Supplementary Fig. S5 and Movie SM1](#)). Close inspection  
131 of STED images revealed that the Z-rings in larger cells were composed of fluorescent  
132 densities ([Fig. 1f](#)) with average lengths and widths of  $132 \pm 48 \text{ nm}$  and  $88 \pm 9$  ( $n =$   
133  $172$ ), respectively, which were similar ( $p > 0.05$ ) to Z-ring densities in untreated cells  
134 ([Fig. 1g](#)).

135 After we had established that large Z-rings can form in cells with increased diameter,  
136 we proceeded to calculate FtsZ dynamics in these larger rings. However, strains  
137 expressing FtsZ-FP as the only source of FtsZ have been shown to have a phenotype  
138 similar to that of FtsZ mutants deficient in GTPase activity, with severely impaired  
139 treadmilling speed <sup>13</sup>. Therefore, we chose to image cells that expressed FtsZ-GFP  
140 from an ectopic locus on the chromosome, in addition to native FtsZ <sup>23</sup>. Earlier studies  
141 showed that FtsZ-GFP, when expressed at levels below 50 % of total cellular FtsZ

142 levels, caused no observable phenotypic changes<sup>9,12,23,24</sup>. In our experimental setup,  
143 FtsZ-GFP was expressed at ~ 30 % of total FtsZ levels ([Supplementary Fig. S2](#)).  
144 Structured Illumination Microscopy (SIM) of drug-treated *E. coli* cells expressing FtsZ-  
145 GFP showed large heterogeneous rings that were similar to those of FtsZ-  
146 mNeonGreen ([Fig. 1h - k](#)). Time-lapse images revealed that FtsZ densities moved  
147 around the midcell circumference, even in Z-rings with a diameter up to three times  
148 larger than that of a WT cell ([Supplementary Movie SM2](#)). There was no difference in  
149 the speed of individual densities in the rings of untreated cells compared to those in  
150 sculptured cells that had a diameter 50 - 200 % larger than WT ( $26 \pm 15$  nm/s and  $30$   
151  $\pm 18$  nm/s, respectively) ([Fig. 1l - m](#)), suggesting that filament treadmilling speed is not  
152 influenced by the length of the cell circumference. ZipA-GFP, an FtsZ membrane  
153 anchor, also moved at essentially the same speed in both normal- and large-sized  
154 rings ( $26 \pm 8$  nm/s) ([Supplementary Fig. S6 and Movie SM3](#)), which is comparable to  
155 previously reported speeds<sup>14</sup>.  
156 Since treadmilling behavior of FtsZ in large cells was very similar to that in WT cells,  
157 we were curious to see whether FtsZ subunit exchange in the rings would also be  
158 similar. To assess this, we performed Fluorescence Recovery After Photobleaching  
159 (FRAP) experiments on both untreated and drug-treated cells. We bleached half of  
160 the FtsZ-GFP molecules in the rings of standing cells and monitored fluorescence  
161 recovery over time ([Fig. 2a](#)). Z-rings in untreated cells had a mean  $t_{1/2}$  recovery time  
162 of  $8.4 \pm 1.9$  sec,  $n = 23$  ([Fig. 2b](#)), consistent with previous studies<sup>14,25</sup>. Surprisingly,  
163 the average  $t_{1/2}$  recovery time was the same for Z-rings with a wide range of diameters  
164 ([Fig. 2b](#)). We believe this reflects the formation of a greater number of FtsZ filaments  
165 at the inner membrane of expanded cells, due to larger accessible surface area ([Fig.](#)  
166 [2c](#)), while filament treadmilling speed remains unchanged.

167

168 *The 'FtsZ-square'*

169 Next, we wanted to know if drug-treated cells placed in deep (5  $\mu\text{m}$ ) rectangular  
170 volumes would adapt to these shapes and effectively form 'Z-rectangles' or 'Z-  
171 squares' instead of 'Z-rings'. Previous work has shown that cells can adapt to  
172 rectangular shapes in shallow wells, approximately 1  $\mu\text{m}$  deep<sup>19</sup>. Here, we produced  
173 quadrilateral patterns in agarose pads using silica micron pillar arrays similar to those  
174 previously described<sup>14</sup>, with the exception that the pillars were rectangular and  $5.5 \pm$   
175  $0.5 \mu\text{m}$  in height. Side lengths of the micron chambers were up to 3.5  $\mu\text{m}$  in length  
176 ([Supplementary Fig. S7](#)), resulting in well volumes up to  $80 \mu\text{m}^3$ , roughly 50-fold larger  
177 than the volume of a WT cell (assuming a WT cell size of 2  $\mu\text{m}$  in length and 1  $\mu\text{m}$  in  
178 width) ([Supplementary Fig. S8](#)).

179 Drug-exposed cells expressing FtsZ-mNeonGreen were placed in rectangular micron  
180 holes and incubated at room temperature for 300 - 420 minutes (longer incubation  
181 times were needed due to increased well size). The cells adapted to their new shapes  
182 and formed rectangular cuboids with only one "Z-square" per cell ([Fig. 3a](#),  
183 [Supplementary Movie SM4](#)). Notably, FtsZ densities were observed both in the sharp  
184 corners and along the sides of the rectangles ([Fig. 3b](#), [Supplementary Fig. S9](#)).  
185 Quantification of the FtsZ-mNeonGreen densities showed that they had similar  
186 dimensions to those in untreated cells, with an average length of  $105.4 \pm 39.6 \text{ nm}$  and  
187 width of  $79.6 \pm 18.2 \text{ nm}$  ( $n = 147$ ) ([Fig. 3c](#)). This suggests that FtsZ filament  
188 dimensions *in vivo* are insensitive to membrane curvature (or lack thereof).

189 To generate a fluorescent FtsZ fusion protein that could be used for both super-  
190 resolution STED imaging and examination of filament dynamics when grown in rich  
191 media at 37 °C, we constructed a plasmid-expressed FtsZ-mCitrine fusion. FtsZ-

192 mCitrine was expressed from an IPTG-inducible, medium copy-number plasmid,  
193 pTrc99a, at a level approximately equal to 30 % of total cellular FtsZ. Under these  
194 conditions, FtsZ-mCitrine formed normal-looking, sharp Z-rings ([Supplementary Figs.](#)  
195 [S1 and S2](#)). Cells expressing FtsZ-mCitrine were then exposed to drugs, trapped in  
196 rectangular micron-sized holes, and incubated for 180 - 280 minutes at room  
197 temperature before gSTED imaging. We found that FtsZ-mCitrine formed filaments  
198 that were  $118.3 \pm 41.3$  nm long and  $86.3 \pm 22.5$  nm wide ( $n = 162$ ), similar to FtsZ-  
199 mNeonGreen filament dimensions ([Fig. 3c](#), [Supplementary Fig. S10](#)), indicating that  
200 fluorophore choice did not influence cluster dimensions in the rings. For consistency,  
201 we also imaged rectangular cells expressing FtsZ-GFP from the chromosome using  
202 SIM ([Supplementary Fig. S10](#)). All three strains tested adapted to the rectangular  
203 shape, producing sharpened-cornered “Z-rectangles”.

204

#### 205 *FtsZ dynamics in rectangular-shaped cells*

206 In order to examine the dynamics of FtsZ in rectangular cells, we performed time-lapse  
207 imaging on cells expressing either FtsZ-mCitrine or FtsZ-GFP. Although a few  
208 fluorescence spots were abnormally bright and immobile ( $\sim 1$  spot / 5 cells, with a  
209 maximum of 2 spots in one cell) ([Fig. 4b](#), [Supplementary Movie SM7](#). [Red arrow](#)), the  
210 majority of FtsZ densities were highly dynamic ([Fig. 4a-b](#), [Supplementary Movies SM5](#)  
211 [- SM6](#)). Note that the bright, immobile spots were excluded from treadmill analyses.  
212 Close inspection of time-lapse sequences suggested that FtsZ bundles in rectangular-  
213 shaped cells may be able to treadmill, even in right-angled corners ([Fig. 4b-c](#),  
214 [Supplementary Movie SM8](#)). The average speed of FtsZ-mCitrine densities in  
215 rectangular cells with perimeter lengths up to  $13 \mu\text{m}$  (more than four times the  
216 circumference of a WT cell) was  $27.6 \pm 12.5$  nm/s ( $n = 109$ ), which was consistent with



217 the measured treadmilling speed of FtsZ-GFP in rectangular cells ( $25.3 \pm 11.3$  nm/s,  
218  $n = 122$ ) (Fig. 4d), large cylindrical cells ( $30 \pm 18$  nm/s, Fig. 1m) and untreated cells (~  
219 25 nm/s)<sup>13,14</sup>.

220 To determine whether the dynamics of FtsZ subunit exchange are affected by changes  
221 to circumferential length and shape, we collected FRAP measurements on FtsZ  
222 bundles in rectangular-shaped cells (Fig. 4e, Supplementary Movie SM9). The  
223 recovery times of half-bleached rectangles of varying sizes matched those of rings,  
224 with mean  $t_{1/2}$  recovery times of  $9.85 \pm 2.58$  s ( $n = 24$ ) and  $9.15 \pm 2.55$  s ( $n = 22$ ) for  
225 FtsZ-mCitrine and FtsZ-GFP, respectively (Fig. 4f). This suggests that subunit  
226 exchange from the cytoplasmic FtsZ pool is independent of circumference length and  
227 membrane curvature. The data thus far indicate that the maintenance and dynamics  
228 of FtsZ filaments are preserved in both large Z-rings and Z-rectangles of varying size.  
229

### 230 *FtsZ dimensions and dynamics in heart-shaped cells*

231 To examine whether FtsZ could literally be (at) the heart of cell division, we engineered  
232 micron pillar arrays that were heart-shaped (Supplementary Fig. S11). Heart shapes  
233 were chosen because they would sculpt cells in such a way that highly curved, straight,  
234 and angled membrane segments would be present within a single cell. Drug-treated  
235 *E. coli* cells expressing cytoplasmic GFP, FtsZ-mNeonGreen or FtsZ-mCitrine were  
236 sculptured into hearts as described above (Fig. 5a). Perhaps not surprisingly,  
237 quantification of 155 individual FtsZ densities from the heart-shaped cells revealed  
238 dimensions similar to those in round and rectangular cells ( $129 \pm 44$  nm long and  $84$   
239  $\pm 9$  nm wide) (Fig. 5b). We also found that the average speed of FtsZ-mCitrine in heart-  
240 shaped cells ( $22 \pm 10$  nm/s,  $n = 44$ ) was essentially the same as that in untreated cells  
241 (Figure 5c, Supplementary Movie SM10).

242 For about one-third of the heart-shaped cells, we noticed bright spots of internalized  
243 FtsZ-FP signal that accumulated close to the cell center (Figure 5c, green arrowhead).  
244 Although we couldn't distinguish whether these were true FtsZ clusters or aggregated  
245 protein, cytoplasmic clustering of FtsZ in WT cells have previously been reported<sup>12</sup>.  
246 Furthermore, although most hearts had FtsZ-FP signal spanning the full perimeter of  
247 the cell, approximately 20 % were only "half full" (Fig. 5d, left). We do not fully  
248 understand the underlying reason for this, however it is unlikely due to image focus or  
249 cell tilt issues, as every cell was scanned in the z direction prior to imaging.  
250 Nevertheless, when we subjected the heart-shaped cells to FRAP, fluorescence  
251 recovery rates were equal for both full and half-full hearts (Fig. 5d), with mean  $t_{1/2}$   
252 recovery times of  $7.1 \pm 1.1$  s (n = 24) and  $6.9 \pm 0.9$  s (n = 9), respectively (Fig. 5e).

253

#### 254 *FtsZ-"rings" form in complex cell shapes*

255 To explore if cell geometry plays a role in Z-"ring" formation, we set out to remodel  
256 cells into other complex shapes. Even though highly complex-shaped bacteria occur  
257 in nature, such as star-shaped bacteria<sup>26</sup>, we wanted to test whether rod-shaped *E.*  
258 *coli* cells would allow themselves to be drastically remodeled. Using micron pillars of  
259 various shapes, we produced holes in agarose pads such that drug-exposed cells  
260 could be sculptured into complex shapes, such as pentagons, half-moons, stars,  
261 triangles and crosses (Fig. 6a, middle row. Supplementary Fig. S11). The cells  
262 conformed remarkably well to these shapes, forming sharp boundary angles  $< 70^\circ$   
263 (Fig. 6a, Star). After we confirmed that cells could adapt to these complex shapes, we  
264 placed cells expressing FtsZ-mCitrine into the micron holes, allowed for reshaping to  
265 occur, and then imaged the cells using STED nanoscopy. Cells of all tested shapes  
266 produced easily recognizable FtsZ-"shapes" at midcell (Fig. 6a, bottom row).

267 Subsequent analysis of the lengths and widths of the FtsZ densities revealed little  
268 difference in dimensions between the different shapes, suggesting a minimal role of  
269 cell shape in determining FtsZ cluster dimensions *in vivo* (Fig. 6b). Additionally, time-  
270 lapse imaging of cells expressing FtsZ-mCitrine in various shapes showed similar  
271 dynamics to those measured in untreated cells (Supplementary Movie SM10).

272

## 273 **Conclusions**

274 Cells, both bacterial and eukaryotic, have the ability to adapt remarkably well to their  
275 local environments<sup>27-31</sup>, reverting to their original shapes after stress<sup>32,33</sup> and dividing  
276 with striking midcell accuracy even when remodeled into irregular cell shapes<sup>27,30</sup>. In  
277 bacteria, the tubulin homologue FtsZ assembles into a ring-like structure at midcell  
278 and is responsible for overall maintenance of the cell division machinery<sup>5,6</sup>. The  
279 general dynamics and organization of the FtsZ-ring have been shown to be quite  
280 similar across many bacterial species<sup>11,13-15,17,34-37</sup>. Common to these species is  
281 confinement of the FtsZ-ring to a circular geometry at midcell. Strikingly, when purified  
282 FtsZ (together with its membrane anchor FtsA) is placed on supported lipid bilayers, it  
283 assembles into a dynamic, swirling ring-like assembly with a diameter resembling that  
284 of wild-type *E. coli* cells (approximately 1  $\mu\text{m}$ ), hinting at an intrinsically preferred FtsZ-  
285 ring curvature<sup>6,38</sup>.

286 In this study, we characterized FtsZ midcell accumulation and dynamics in cell shape-  
287 determining environments by 'looking through the Z-ring' along the long-axis of cells.  
288 We observed normal-looking FtsZ-rings in cells with diameters three times the size  
289 found in WT cells. However, this might not be surprising, considering only ~ 30 % of  
290 the pool of FtsZ molecules are in the ring of WT cells at any given point in time<sup>39</sup>.  
291 Quantification of FtsZ dimensions revealed little variation between different cell

292 shapes, such as squares, pentagons, triangles and stars (on average 123 x 80 nm,  
293 length x width, respectively, and summarized in [Table 1](#)), suggesting that local  
294 membrane geometry has minimal influence on FtsZ cluster dimensions. Compared to  
295 untreated cells, rectangular and heart-shaped cells with perimeter lengths more than  
296 four times that of a WT cell exhibited similar overall dynamics of FtsZ, as FtsZ-FP  
297 fluorescence densities treadmilled at the same average velocity and FtsZ subunit  
298 exchange occurred at similar rates ([Table 2](#)), independent of cell shape and size.

299

300 In summary, our results from different shaped cells show that Z-“ring” formation and  
301 dynamics are not limited to cells of a certain shape or size. This agrees with previous  
302 findings, which show that internal cellular structures are maintained in cells that have  
303 been reshaped into unnatural forms <sup>19</sup>. Our observation that FtsZ clusters conform to  
304 the geometric shape of the membrane at midcell suggests that FtsZ-ring formation is  
305 not affected by changes in membrane curvature. Indeed, cell shape and size are  
306 important for proper cellular functions <sup>40</sup>, however, with the many naturally-occurring  
307 shape variations of bacteria <sup>26,41</sup>, it is perhaps not surprising that FtsZ can adapt to  
308 changing environments without compromising its own ability to maintain fundamental  
309 functionality. Although our data do not explicitly show that sculptured cells can divide  
310 (since downstream division proteins were inhibited), the fact that the dynamic  
311 properties of FtsZ are conserved suggests that this may be possible. One particular  
312 implication of this is the notion that the Z-ring can be decoupled from the division  
313 process but with maintained dynamics, making treadmilling a possible requirement for  
314 divisive assembly and organization in rod shaped model bacteria, as previously  
315 suggested for cocci <sup>17</sup>. Presently, we have shown *in vivo* that *E. coli* FtsZ-ring  
316 formation and dynamics are conserved, irrespective of cell shape and size.

## 317 **Methods**

### 318 *Bacterial growth*

319 Pre-cultures were grown overnight in 20 ml of rich media (LB) at 37 °C or M9 minimal  
320 media supplemented with 1 µg ml<sup>-1</sup> thiamine, 0.2 % (w/v) glucose and 0.1 % (w/v)  
321 casamino acids. The following morning, cultures were back-diluted 1:50 in either LB  
322 or M9 (with supplements) and antibiotics (ampicillin 25 µg ml<sup>-1</sup>) when needed, and  
323 incubated at 30 °C or 37 °C.

324

### 325 *Fluorescent protein production*

326 Chromosomally-encoded FtsZ-mNeonGreen was integrated at the native *ftsZ* locus  
327 and did not require any inducer<sup>18</sup>. Chromosomally-encoded FtsZ-GFP (strain BS001),  
328 GFP<sup>CYTO</sup> (strain BS008) and ZipA-GFP were induced with 2.5 µM, 5 µM and 50 µM  
329 IPTG, respectively<sup>9</sup>.

330 The plasmid pHC054 (*ftsZ-mCitrine*) was constructed using Gibson assembly<sup>42</sup> to  
331 generate an IPTG-inducible FtsZ-mCitrine fusion expressed from pTrc99a<sup>43</sup>. PCR  
332 was performed using Q5 High-Fidelity DNA polymerase (New England Biolabs). A  
333 DNA fragment containing *ftsZ* was amplified from *E. coli* MC4100 genomic DNA using  
334 primers FtsZ(F) (5'-caatttcacacaggaaacagaccatggatggttgaaccaatggaac-3') and  
335 FtsZ(R) (5'-gcccttgctcaccatctgcaggtgtgttatcagcttgcttacgcagg-3'). *mCitrine* was  
336 amplified from mCitrine-N1 plasmid DNA using primers mCitrine(F) (5'-  
337 cgtaagcaagctgataacaacaacctgcagatggtgagcaagggcgaggag-3') and mCitrine(R) (5'-  
338 ccgcaaaacagccaagctttactgtacagctcgtccatgc-3). pTrc99a plasmid DNA was  
339 amplified using primers pTrc99a(F) (5'-ccatggtctgtttcctgtgtg-3') and pTrc99a(R) (5'-  
340 aagcttggtgttttggcgg-3'). The *ftsZ* and *mCitrine* coding regions are separated by a  
341 short linker encoding NNNLQ. The plasmid sequence was verified by DNA sequencing

342 (Fasmac, Japan). FtsZ-mCitrine expression was induced with 2.5  $\mu$ M IPTG. All FtsZ  
343 levels were quantified using Western blotting.

344

#### 345 *Western blot analysis*

346 Cell extracts from a volume corresponding to 0.1 OD<sub>600</sub> units were collected for each  
347 strain to be analyzed. The extracts were suspended in loading buffer and resolved by  
348 SDS-PAGE gel electrophoresis. Proteins were transferred to nitrocellulose  
349 membranes using a semi-dry Transfer-Blot apparatus (Bio-Rad). The membranes  
350 were blocked in 5 % (w/v) milk and probed with antisera to FtsZ (Agrisera, Sweden)  
351 and detected using standard methods.

352

#### 353 *Nanofabrication of micro arrays*

354 Micron pillars were engineered using two different, but related, approaches. The first  
355 approach was used for round and square/rectangular micron pillars, and was adapted  
356 from <sup>14,15</sup>. Briefly, using a multi-step process similar to that described in <sup>44</sup>, micron-  
357 scale pillars were fabricated on a silicon (Si) substrate by reactive ion etching. A  
358 pattern of hard-baked photoresist was created on a Si surface using UV lithography,  
359 to work as a mask for etching. Subsequent etching was performed using an Oxford  
360 Plasmalab100 ICP180 CVD/Etch system, with a mixture of SF<sub>6</sub> and O<sub>2</sub> plasma as an  
361 etchant. For our process, a SF<sub>6</sub>:O<sub>2</sub> ratio of 1:1 was optimal. After etching, the  
362 remaining photoresist was removed by O<sub>2</sub> plasma treatment. Pillar arrays (1 x 1 cm or  
363 2 x 2 cm) with round pillars were engineered to contain one micron-sized pillar every  
364 5  $\mu$ m, with dimensions between 0.9 and 3.5  $\mu$ m wide and 5.25  $\pm$  0.75  $\mu$ m high  
365 ([Supplementary Fig. S3](#)). Pillar arrays (1 x 1 cm) with square pillars contained micron-

366 sized pillars approximately every 5  $\mu\text{m}$ , with side lengths varying between 1.8 and 3.5  
367  $\mu\text{m}$ , and heights of  $5.5 \pm 0.5 \mu\text{m}$  ([Supplementary Fig. S7](#)).

368 To create more complex shapes, a second approach, based on electron beam  
369 lithography was used. For this, the micron-scale structures were fabricated on a Si  
370 substrate by a multi-step process, which was a combination of electron beam  
371 lithography and reactive ion etching techniques. Similar approaches to silicon  
372 patterning are described in a number of earlier works <sup>44-47</sup>. First, a pattern of e-beam  
373 resist was created on a Si surface using e-beam lithography. A 50 nm-thick Ti layer  
374 was then deposited, and a lift-off process was used to create a metal mask for etching.  
375 The use of a metal mask, instead of a baked e-beam resist mask, was necessary due  
376 to the high selectivity ratio required for generating structures only a few microns in  
377 height. Finally, the etching process was performed as described above, using an  
378 Oxford Plasmalab100 ICP180 CVD/Etch system and a mixture of  $\text{SF}_6$  and  $\text{O}_2$  plasma  
379 as an etchant. For our process, a  $\text{SF}_6:\text{O}_2$  flow ratio of 3:2 produced the best results,  
380 with a Si:Ti etching selectivity ratio of approximately 100:1. Increased concentration of  
381  $\text{O}_2$  in the mixture has two effects: (i) it improves etching anisotropy, which is essential  
382 for avoiding shape distortion from the undercut effect, and (ii) it reduces the selectivity  
383 ratio, as the Si etch rate gets slower. After etching, the structures were characterized  
384 using a Dektak surface profiler and SEM imaging. The micron structure arrays, which  
385 contained various shapes (hearts, triangles, pentagons, half-moons and crosses),  
386 were fabricated on 1 x 1 cm Si chips with inter-structure distances of approximately 5  
387  $\mu\text{m}$ , and structure heights of  $5.5 \pm 0.5 \mu\text{m}$  ([Supplementary Fig. S11](#)).

388

389

390

391 *Micron-sized chamber production and cell growth*

392 Liquefied agarose (5% w/v) in M9 minimal media (supplemented with 0.2 % glucose,  
393 0.1 % casamino acids, 2  $\mu\text{g ml}^{-1}$  thiamine, 40  $\mu\text{M}$  A22 and 20  $\mu\text{g ml}^{-1}$  cephalixin) was  
394 dispersed on glass slides and the silica mold (pillar facing downwards) was placed on  
395 top. The molds contained either round or rectangular pillars, or various geometrical  
396 shapes, as described above. Once the agarose solidified, the mold was removed and  
397  $\sim 5 \mu\text{l}$  of live cell culture at  $\text{OD}_{600}$  0.4 - 0.55 (pre-treated with 16  $\mu\text{M}$  A22 for 10 - 15  
398 minutes) was applied on top. To allow the cells to adapt to the different shapes, slides  
399 were incubated at RT or 30 °C in a parafilm-sealed petri dish together with a wet tissue  
400 to prevent drying. After incubation, cells were covered with a pre-cleaned cover glass  
401 (#1.5) for live cell imaging. For STED imaging, cells were first fixed with ice-cold  
402 methanol for 5 minutes and carefully rinsed with PBS prior to cover glass application.

403

404 *Microscopy*

405 Gated STED (gSTED) images were acquired on a Leica TCS SP8 STED 3X system,  
406 using a HC PL Apo 100x oil immersion objective with NA 1.40. Fluorophores were  
407 excited using a white excitation laser operated at 488 nm for mNeonGreen and 509  
408 nm for mCitrine. A STED depletion laser line was operated at 592 nm, using a  
409 detection time-delay of 0.8 – 1.6 ns for both fluorophores. The total depletion laser  
410 intensity was in the order of 20 - 40  $\text{MW/cm}^2$  for all STED imaging. The final pixel size  
411 was 13 nm and scanning speed was either 400 or 600 Hz. The pinhole size was set  
412 to 0.9 AU.

413 Epi-fluorescence and confocal images were acquired on either a Zeiss LSM780 or  
414 Zeiss ELYRA PS1 (both equipped with a 100X 1.46NA plan Apo oil immersion  
415 objective) with acquisition times between 0.3 and 2 sec. Time-lapse series for



416 generating kymographs were recorded at 2 sec intervals for a time period of at least  
417 118 sec.

418 SIM images were acquired using a Zeiss ELYRA PS1 equipped with a pco.edge  
419 sCMOS camera. The final pixel size in SIM images was 24 nm. Individual images were  
420 acquired using an acquisition time of 200 ms per image (a total of 15 images were  
421 acquired per SIM image reconstruction) and subsequently reconstructed from the raw  
422 data using ZEN2012 software. SIM time-lapse movies (containing at least 14 frames)  
423 were recorded without time delays between image stacks.

424 Confocal Z-stacks (focal plane  $\pm \sim 3.5 \mu\text{m}$ ) were acquired on a Leica TCS SP8 STED  
425 3X system (operated in confocal mode) using predetermined optimal system settings  
426 (Leica, LAS X), with  $0.22 \mu\text{m}$  steps (resulting in 30-32 images per stack), and pinhole  
427 size 1 AU. All imaging was performed at RT ( $\sim 23\text{-}24 \text{ }^\circ\text{C}$ ).

428

#### 429 *FRAP measurements*

430 Confocal FRAP measurements were performed on a Zeiss LSM780 system using a  
431 100x 1.4 NA plan Apo oil immersion objective and pinhole size  $60 \mu\text{m}$ , as described  
432 <sup>14</sup>. Bleaching was performed for 0.5-0.7 s using 100% laser power applied over the  
433 region of interest. Data were collected in time intervals of 1 - 2 sec until steady state  
434 was reached. Following background correction, and to account for overall successive  
435 bleaching, the fluorescence intensity (F) of the bleached region (half a ring) was  
436 normalized to the average ring fluorescence of an unbleached area of the same size,  
437 for each time point (t);  $F_{\text{NORM}}(t) = F_{\text{BLEACHED}}(t)/(F_{\text{BLEACHED}}(t) + F_{\text{UNBLEACHED}}(t))$ . All data  
438 were exported to Origin9 Pro and data points were fitted to the single exponential  
439 function  $F(t) = F_{\text{end}} - (F_{\text{end}} - F_{\text{start}}) * e^{-kt}$ , where F(t) is the fluorescence intensity at time  
440 t,  $F_{\text{end}}$  is the fluorescence intensity at maximum recovery,  $F_{\text{start}}$  is the fluorescence

441 recovery momentarily after bleaching (at  $t = 0$ ), and  $k$  is a free parameter. The recovery  
442 half-time was then extracted from  $t_{1/2} = \ln 2 / k$ . Importantly, all cells were scanned  
443 from top to bottom in order to find the division plane (in which the rings reside).

444

#### 445 *Image analysis*

446 Image analysis was performed using Fiji. When necessary, images were background-  
447 corrected using a rolling ball with radius 36. Image stacks were motion-corrected using  
448 the plug-in StackReg. Kymographs were generated from time-lapse images using the  
449 KymoResliceWide plugin (line width 5), from which treadmilling speeds were  
450 calculated using the slope of the fluorescence trace, as previously described<sup>38</sup>.

451 STED images were deconvolved using Huygens Professional deconvolution software  
452 (SVI, the Netherlands). FtsZ-ring diameters were extracted from the average values  
453 of the Gaussian fitted fluorescence profiles drawn from 12 - 6 o'clock and 3 - 9 o'clock.  
454 Side lengths of shaped cells were determined by applying line profiles in ImageJ. The  
455 lengths and widths of individual FtsZ densities were obtained using line scans (line  
456 size 4) over at least 5 randomly selected individual fluorescence spots from each  
457 deconvolved cell image, whereby a Gaussian was fitted to the intensity profiles in order  
458 to extract the Full Width at Half Maximum (FWHM). Note that the long and short axes  
459 of each individual FtsZ density were assigned as "length" and "width", respectively,  
460 regardless of orientation relative to the membrane. FtsZ cluster dimensions are given  
461 in mean  $\pm$  S.D.  $n$  indicates number of cells, unless explicitly specified.

462

#### 463 *Statistical analysis*

464 Boxes represent S.D., with red lines indicating mean. Whiskers on the box plots  
465 encompass 95.5% of the distribution. For statistical analyses, two-tailed Student's  $t$ -

466 tests were performed using Origin Pro 9. A  $p$ -value of  $< 0.05$  was considered as  
467 statistically significant.

468

#### 469 *Data availability*

470 Data presented and material used in this paper can be available upon request from  
471 the authors.

472

#### 473 **Acknowledgements**

474 The authors would like to thank Harold Erickson (Duke Uni.) for sharing the FtsZ-  
475 mNeonGreen strain. Daniel Daley (Stockholm Uni.) is acknowledged for valuable  
476 suggestions to improve the manuscript. BS is supported by JSPS KAKENH (grant  
477 number JP17K15694). Work in the SCB unit at OIST is funded by core subsidy from  
478 Okinawa Institute of Science and Technology Graduate University.

479

#### 480 **Author contributions**

481 B.S. conceived the study and performed the experiments. A.B. and B.S. designed and  
482 engineered the micron pillar arrays. H.C. contributed reagents. B.S. and U.S. analyzed  
483 the data. B.S. wrote the manuscript with input from all authors.

484

#### 485 **Competing financial interests**

486 The authors declare no conflicting or competing financial interests.

487

488

489 **References**

- 490 1 de Boer, P. A. Advances in understanding *E. coli* cell fission. *Curr Opin*  
491 *Microbiol* **13**, 730-737, doi:10.1016/j.mib.2010.09.015 (2010).
- 492 2 Lutkenhaus, J., Pichoff, S. & Du, S. Bacterial cytokinesis: From Z ring to  
493 divisome. *Cytoskeleton* **69**, 778-790, doi:10.1002/cm.21054 (2012).
- 494 3 Meier, E. L. & Goley, E. D. Form and function of the bacterial cytokinetic ring.  
495 *Current opinion in cell biology* **26**, 19-27, doi:10.1016/j.ceb.2013.08.006  
496 (2014).
- 497 4 Haeusser, D. P. & Margolin, W. Splitsville: structural and functional insights  
498 into the dynamic bacterial Z ring. *Nat Rev Microbiol* **14**, 305-319,  
499 doi:10.1038/nrmicro.2016.26 (2016).
- 500 5 den Blaauwen, T., Hamoen, L. W. & Levin, P. A. The divisome at 25: the road  
501 ahead. *Curr Opin Microbiol* **36**, 85-94, doi:10.1016/j.mib.2017.01.007 (2017).
- 502 6 Erickson, H. P., Anderson, D. E. & Osawa, M. FtsZ in bacterial cytokinesis:  
503 cytoskeleton and force generator all in one. *Microbiol Mol Biol Rev* **74**, 504-  
504 528, doi:10.1128/MMBR.00021-10 (2010).
- 505 7 Ortiz, C., Natale, P., Cueto, L. & Vicente, M. The keepers of the ring:  
506 regulators of FtsZ assembly. *FEMS microbiology reviews* **40**, 57-67,  
507 doi:10.1093/femsre/fuv040 (2016).
- 508 8 Skoog, K., Söderström, B., Widengren, J., von Heijne, G. & Daley, D. O.  
509 Sequential closure of the cytoplasm and then the periplasm during cell  
510 division in *Escherichia coli*. *Journal of bacteriology* **194**, 584-586,  
511 doi:10.1128/JB.06091-11 (2012).

- 512 9 Söderström, B. *et al.* Disassembly of the divisome in *Escherichia coli*:  
513 evidence that FtsZ dissociates before compartmentalization. *Molecular*  
514 *microbiology* **92**, 1-9, doi:10.1111/mmi.12534 (2014).
- 515 10 Egan, A. J. F. Bacterial outer membrane constriction. *Molecular microbiology*  
516 **107**, 676-687, doi:10.1111/mmi.13908 (2018).
- 517 11 Fu, G. *et al.* In vivo structure of the *E. coli* FtsZ-ring revealed by  
518 photoactivated localization microscopy (PALM). *PLoS One* **5**, e12682,  
519 doi:10.1371/journal.pone.0012680 (2010).
- 520 12 Coltharp, C., Buss, J., Plumer, T. M. & Xiao, J. Defining the rate-limiting  
521 processes of bacterial cytokinesis. *Proc Natl Acad Sci U S A* **113**, E1044-  
522 1053, doi:10.1073/pnas.1514296113 (2016).
- 523 13 Yang, X. *et al.* GTPase activity-coupled treadmilling of the bacterial tubulin  
524 FtsZ organizes septal cell wall synthesis. *Science* **355**, 744-747,  
525 doi:10.1126/science.aak9995 (2017).
- 526 14 Söderström, B., Chan, H., Shilling, P. J., Skoglund, U. & Daley, D. O. Spatial  
527 separation of FtsZ and FtsN during cell division. *Molecular microbiology* **107**,  
528 387-401, doi:10.1111/mmi.13888 (2018).
- 529 15 Bisson-Filho, A. W. *et al.* Treadmilling by FtsZ filaments drives peptidoglycan  
530 synthesis and bacterial cell division. *Science* **355**, 739-743,  
531 doi:10.1126/science.aak9973 (2017).
- 532 16 Schoenemann, K. M. & Margolin, W. Bacterial Division: FtsZ Treadmills to  
533 Build a Beautiful Wall. *Curr Biol* **27**, R301-R303,  
534 doi:10.1016/j.cub.2017.03.019 (2017).

- 535 17 Monteiro, J. M. *et al.* Peptidoglycan synthesis drives an FtsZ-treadmilling-  
536 independent step of cytokinesis. *Nature* **554**, 528-532,  
537 doi:10.1038/nature25506 (2018).
- 538 18 Moore, D. A., Whatley, Z. N., Joshi, C. P., Osawa, M. & Erickson, H. P.  
539 Probing for Binding Regions of the FtsZ Protein Surface through Site-Directed  
540 Insertions: Discovery of Fully Functional FtsZ-Fluorescent Proteins. *Journal of*  
541 *bacteriology* **199**, doi:UNSP e00553 10.1128/JB.00553-16 (2017).
- 542 19 Wu, F., van Schie, B. G., Keymer, J. E. & Dekker, C. Symmetry and scale  
543 orient Min protein patterns in shaped bacterial sculptures. *Nat Nanotechnol*  
544 **10**, 719-726, doi:10.1038/nnano.2015.126 (2015).
- 545 20 Hussain, S. *et al.* MreB filaments align along greatest principal membrane  
546 curvature to orient cell wall synthesis. *Elife* **7**, doi:10.7554/eLife.32471 (2018).
- 547 21 Garner, E. C. *et al.* Coupled, circumferential motions of the cell wall synthesis  
548 machinery and MreB filaments in *B. subtilis*. *Science* **333**, 222-225,  
549 doi:10.1126/science.1203285 (2011).
- 550 22 Weiss, D. S., Chen, J. C., Ghigo, J. M., Boyd, D. & Beckwith, J. Localization  
551 of FtsI (PBP3) to the septal ring requires its membrane anchor, the Z ring,  
552 FtsA, FtsQ, and FtsL. *Journal of bacteriology* **181**, 508-520 (1999).
- 553 23 Söderström, B. *et al.* Coordinated disassembly of the divisome complex in  
554 *Escherichia coli*. *Molecular microbiology* **101**, 425-438,  
555 doi:10.1111/mmi.13400 (2016).
- 556 24 Rowlett, V. W. & Margolin, W. 3D-SIM super-resolution of FtsZ and its  
557 membrane tethers in *Escherichia coli* cells. *Biophysical journal* **107**, L17-20,  
558 doi:10.1016/j.bpj.2014.08.024 (2014).

- 559 25 Anderson, D. E., Gueiros-Filho, F. J. & Erickson, H. P. Assembly dynamics of  
560 FtsZ rings in *Bacillus subtilis* and *Escherichia coli* and effects of FtsZ-  
561 regulating proteins. *Journal of bacteriology* **186**, 5775-5781,  
562 doi:10.1128/JB.186.17.5775-5781.2004 (2004).
- 563 26 Young, K. D. The selective value of bacterial shape. *Microbiol Mol Biol Rev*  
564 **70**, 660-703, doi:10.1128/MMBR.00001-06 (2006).
- 565 27 Mannik, J. *et al.* Robustness and accuracy of cell division in *Escherichia coli*  
566 in diverse cell shapes. *Proceedings of the National Academy of Sciences of*  
567 *the United States of America* **109**, 6957-6962, doi:10.1073/pnas.1120854109  
568 (2012).
- 569 28 Mannik, J., Driessen, R., Galajda, P., Keymer, J. E. & Dekker, C. Bacterial  
570 growth and motility in sub-micron constrictions. *Proceedings of the National*  
571 *Academy of Sciences of the United States of America* **106**, 14861-14866,  
572 doi:10.1073/pnas.0907542106 (2009).
- 573 29 Zhou, Z. *et al.* The contractile ring coordinates curvature-dependent septum  
574 assembly during fission yeast cytokinesis. *Mol Biol Cell* **26**, 78-90,  
575 doi:10.1091/mbc.E14-10-1441 (2015).
- 576 30 Minc, N., Burgess, D. & Chang, F. Influence of cell geometry on division-plane  
577 positioning. *Cell* **144**, 414-426, doi:10.1016/j.cell.2011.01.016 (2011).
- 578 31 Takeuchi, S., DiLuzio, W. R., Weibel, D. B. & Whitesides, G. M. Controlling  
579 the shape of filamentous cells of *Escherichia coli*. *Nano Lett* **5**, 1819-1823,  
580 doi:10.1021/nl0507360 (2005).
- 581 32 Wong, F. *et al.* Mechanical strain sensing implicated in cell shape recovery in  
582 *Escherichia coli*. *Nat Microbiol* **2**, 17115, doi:10.1038/nmicrobiol.2017.115  
583 (2017).

- 584 33 Monahan, L. G. *et al.* Rapid conversion of *Pseudomonas aeruginosa* to a  
585 spherical cell morphotype facilitates tolerance to carbapenems and penicillins  
586 but increases susceptibility to antimicrobial peptides. *Antimicrobial agents and*  
587 *chemotherapy* **58**, 1956-1962, doi:10.1128/AAC.01901-13 (2014).
- 588 34 Yao, Q. *et al.* Short FtsZ filaments can drive asymmetric cell envelope  
589 constriction at the onset of bacterial cytokinesis. *EMBO J*,  
590 doi:10.15252/embj.201696235 (2017).
- 591 35 Strauss, M. P. *et al.* 3D-SIM Super Resolution Microscopy Reveals a Bead-  
592 Like Arrangement for FtsZ and the Division Machinery: Implications for  
593 Triggering Cytokinesis. *PLoS biology* **10**, doi:ARTN e1001389  
594 10.1371/journal.pbio.1001389 (2012).
- 595 36 Holden, S. J. *et al.* High throughput 3D super-resolution microscopy reveals  
596 *Caulobacter crescentus* in vivo Z-ring organization. *Proceedings of the*  
597 *National Academy of Sciences of the United States of America* **111**, 4566-  
598 4571, doi:10.1073/pnas.1313368111 (2014).
- 599 37 Jacq, M. *et al.* Remodeling of the Z-Ring Nanostructure during the  
600 *Streptococcus pneumoniae* Cell Cycle Revealed by Photoactivated  
601 Localization Microscopy. *mBio* **6**, doi:10.1128/mBio.01108-15 (2015).
- 602 38 Loose, M. & Mitchison, T. J. The bacterial cell division proteins FtsA and FtsZ  
603 self-organize into dynamic cytoskeletal patterns. *Nature cell biology* **16**, 38-46,  
604 doi:10.1038/ncb2885 (2014).
- 605 39 Stricker, J., Maddox, P., Salmon, E. D. & Erickson, H. P. Rapid assembly  
606 dynamics of the *Escherichia coli* FtsZ-ring demonstrated by fluorescence  
607 recovery after photobleaching. *Proceedings of the National Academy of*



- 608            *Sciences of the United States of America* **99**, 3171-3175,  
609            doi:10.1073/pnas.052595099 (2002).
- 610    40    Surovtsev, I. V. & Jacobs-Wagner, C. Subcellular Organization: A Critical  
611            Feature of Bacterial Cell Replication. *Cell* **172**, 1271-1293,  
612            doi:10.1016/j.cell.2018.01.014 (2018).
- 613    41    Caccamo, P. D. & Brun, Y. V. The Molecular Basis of Noncanonical Bacterial  
614            Morphology. *Trends Microbiol* **26**, 191-208, doi:10.1016/j.tim.2017.09.012  
615            (2018).
- 616    42    Gibson, D. G. *et al.* Enzymatic assembly of DNA molecules up to several  
617            hundred kilobases. *Nature methods* **6**, 343-U341, doi:10.1038/NMETH.1318  
618            (2009).
- 619    43    Amann, E., Ochs, B. & Abel, K. J. Tightly regulated tac promoter vectors  
620            useful for the expression of unfused and fused proteins in *Escherichia coli*.  
621            *Gene* **69**, 301-315 (1988).
- 622    44    Antonov, P. V., Zuiddam, M. R. & Frenken, J. W. M. Fabrication of high-  
623            aspect ratio silicon nanopillars for tribological experiments. *J Micro-Nanolith*  
624            *Mem* **14**, doi:Artn 044506 10.1117/1.Jmm.14.4.044506 (2015).
- 625    45    Ayari-Kanoun, A., Aydinoglu, F., Cui, B. & Saffih, F. Silicon nanostructures  
626            with very large negatively tapered profile by inductively coupled plasma-RIE. *J*  
627            *Vac Sci Technol B* **34**, doi:Artn 06kd01 10.1116/1.4964402 (2016).
- 628    46    Martin, M. *et al.* Fabrication of high-density Si and Si<sub>0.9</sub>Ge<sub>0.1</sub> nanowire arrays  
629            based on the single step plasma etching process. *J Vac Sci Technol B* **31**,  
630            doi:Artn 041806  
631            10.1116/1.4812792 (2013).

632 47 Engstrom, D. S. & Soh, Y. A. Controlling the silicon nanowire tapering angle in  
633 dense arrays of silicon nanowires using deep reactive ion etching. *J Vac Sci*  
634 *Technol B* **31**, doi:Artn 021806 10.1116/1.4793500 (2013).

635

636

637

638

639

640

641 **Figures and Tables**

642

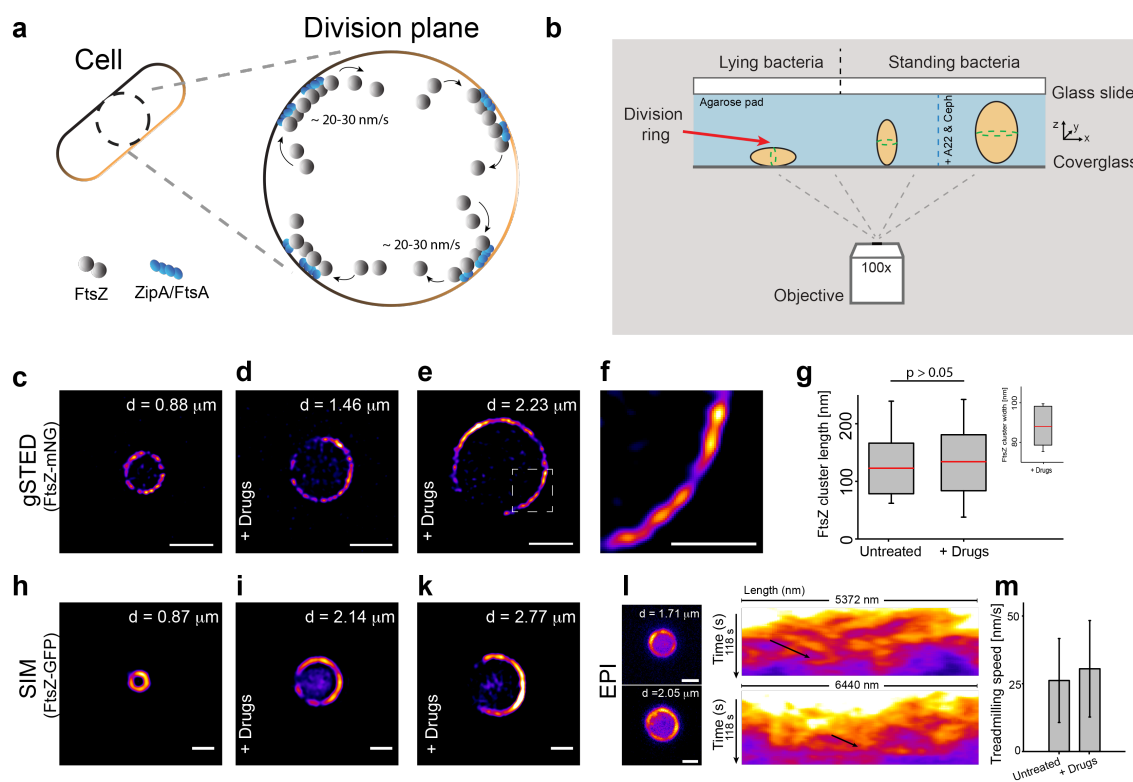

643

644 **Figure 1. Midcell Z-ring assembly is unaffected by increased cell diameter.**

645 **a**, Simplified cartoon showing FtsZ treadmilling at the division plane of an

646 *E. coli* cell. For clarity, only the membrane tethers, FtsA and ZipA, are shown.

647 **b**, Schematic representation of cell placement for imaging. Standing cells were

648 trapped in a vertical position in micron-sized holes in agarose pads created using

649 micron-sized pillars. Conditions for proper division ring placement are met when width

650 < length. The left and middle cells represent untreated cells. The cell on the right has

651 increased dimensions due to drug exposure (A22 and cephalixin).

652 **c**, Time-gated STED (gSTED) image of a typical FtsZ-ring (FtsZ-mNeonGreen) in an untreated

653 standing cell. Scale bar = 1 μm. **d** and **e**, gSTED images of FtsZ-mNeonGreen rings

654 in *E. coli* cells treated with drugs, showing increased ring diameter. Scale bar = 1 μm.

655 “Drugs” refer to A22 and cephalixin. **f**, Close-up of representative FtsZ densities

656 shown in **e**, from a cell with increased diameter. Scale bar = 0.5  $\mu\text{m}$ . **g**, Quantification  
657 of FtsZ density lengths in untreated and drug-treated cells. Mean  $\pm$  S.D. was  $122.8 \pm$   
658  $43.9$  nm ( $n = 77$ ) and  $132.4 \pm 48.7$  nm ( $n = 172$ ) for untreated and drug-treated cells,  
659 respectively. No statistically significant difference was measured,  $p > 0.05$ . Inset  
660 shows density widths in drug-treated cells, mean  $\pm$  S.D. =  $88.4 \pm 9.8$  nm ( $n = 172$ ). **h**  
661 - **k**, Structured Illumination Microscopy (SIM) images of FtsZ-GFP in *E. coli* cells (**h**)  
662 untreated or (**i** - **k**) treated with drugs. Scale bars = 1  $\mu\text{m}$ . **l**, Snapshots of  
663 epifluorescence (EPI) images from time-lapse series of FtsZ-GFP dynamics in drug-  
664 treated cells. Scale bars = 1  $\mu\text{m}$ . Corresponding kymographs are shown adjacent to  
665 each image. Black arrows point to examples of FtsZ trajectories. **m**, Average  
666 treadmill speed of FtsZ-GFP in untreated ( $26 \pm 15$  nm/s,  $n = 102$ ) and drug-treated  
667 cells ( $30 \pm 18$  nm/s,  $n = 102$ ). "d" in (**c** - **e**) and (**h** - **l**) indicates cell diameter.

668

669

670

671

672

673

674

675

676

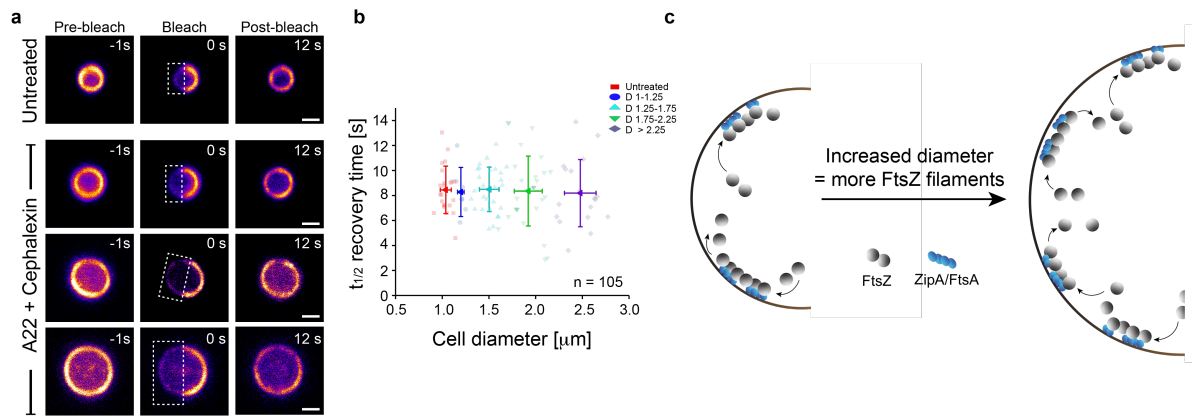

677

678 **Figure 2. Cell size independent recovery of fluorescence in FtsZ-rings.**

679 FRAP measurements on FtsZ-GFP rings in *E. coli* cells trapped standing in a vertical

680 position. **a**, Representative cells of different diameter, untreated or treated with drugs.

681 White boxes indicate bleached areas. Scale bars = 1  $\mu\text{m}$ . **b**, Quantification of FRAP

682 data from untreated cells (red), and drug-treated cells (other colors), showing that

683 fluorescence recovery time is independent of cell diameter (in the range investigated,

684 *i.e.*  $\sim 1 - 3 \mu\text{m}$ ).  $n_{\text{tot}} = 105$ . "D" = cell diameter range. (see [SI text](#) for detailed values).

685 **c**, Schematic representation of possible FtsZ filament distribution in cells of different

686 diameters. Cells with larger diameter can accommodate a greater number of FtsZ

687 filaments.

688

689

690

691

692

693

694

695

696

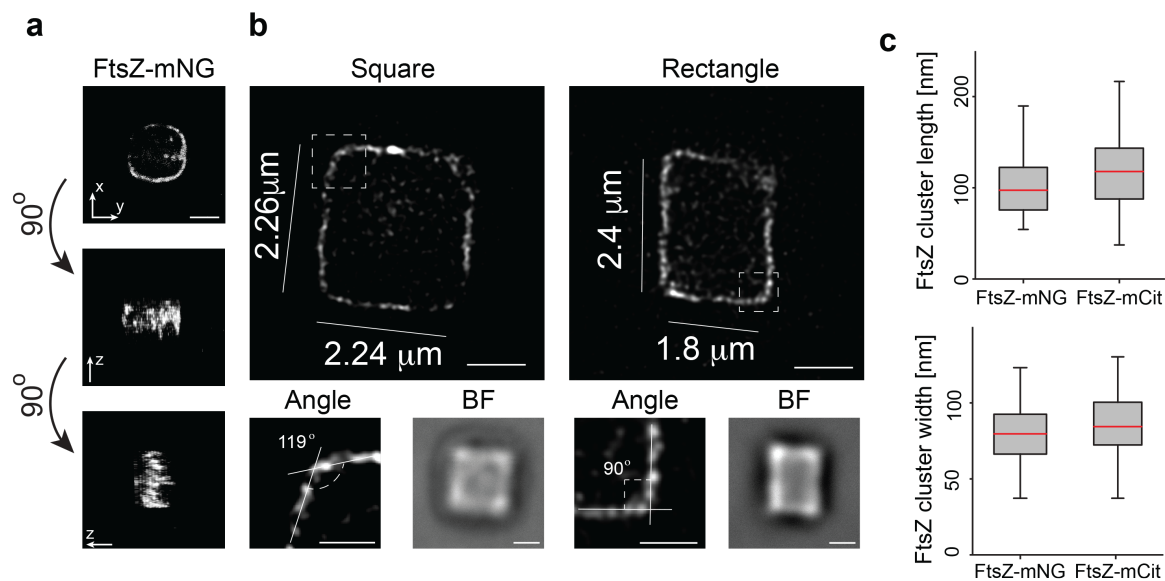

697

698 **Figure 3. FtsZ-squares and -rectangles in shaped cells.**

699 Drug-treated (A22 and cephalixin) *E. coli* cells expressing FtsZ-mNeonGreen were  
700 sculptured into rectangular shapes and imaged using super-resolution STED  
701 nanoscopy. **a**, 3D rendering of a confocal Z-stack of an FtsZ-mNeonGreen square,  
702 showing only one band of FtsZ. Note that information along the z-axis is elongated. **b**,  
703 Representative STED images of FtsZ-mNeonGreen in square (left) and rectangular  
704 (right) cells with perimeters ranging from 8.4 to 11.52 μm (compared to WT ~ 3 μm).  
705 Additional examples are provided in [Supplementary Fig. S9](#). Close-up images show  
706 representative corner angles. BF, brightfield image of corresponding cells. **c**,  
707 Quantification of FtsZ cluster dimensions, showing little difference between FtsZ-  
708 mNeonGreen ( $105.4 \pm 39.6$ ,  $79.6 \pm 18.2$ ; length and width, respectively.  $n = 147$ ) and  
709 FtsZ-mCitrine ( $118.3 \pm 41.3$ ,  $86.3 \pm 22.5$ ; length and width, respectively.  $n = 162$ ).  
710 Example images of FtsZ-mCitrine squares are shown in [Supplementary Fig. S10](#).  
711 Scale bars = 1 μm.

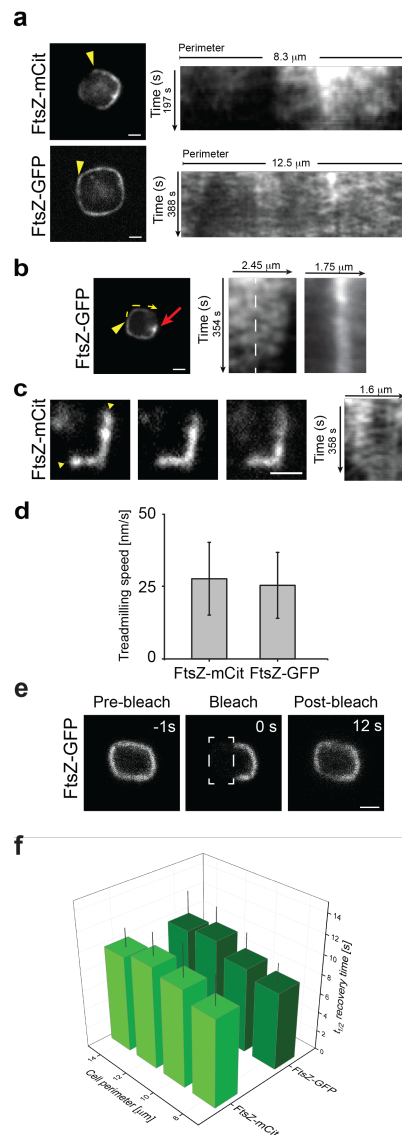

712

713 **Figure 4. FtsZ dynamics in rectangular-shaped cells.**

714 The dynamics of FtsZ in rectangular shapes were assessed by time-lapse imaging

715 and FRAP measurements on *E. coli* cells expressing FtsZ-mCitrine or FtsZ-GFP. **a -**

716 **c**, Snapshot images from time-lapse series of FtsZ-mCitrine or FtsZ-GFP in

717 rectangular shaped cells. Corresponding kymographs are shown next to each image.

718 **a**, Kymographs were taken around the entire perimeter (starting in the upper left

719 corner, moving counter-clockwise, indicated by the yellow arrowheads). **b**,

720 Kymographs were taken along the yellow line starting at the yellow arrowhead (left

721 kymograph), or over the bright spot indicated by the red arrow (right kymograph). The

722 white striped line in **b** indicates the upper left corner of the cell. **c**, Kymograph taken  
723 between the yellow arrowheads (top to bottom is left to right in the kymograph). **d**,  
724 Average treadmilling speed of FtsZ-mCitrine and FtsZ-GFP in rectangles was  $27.6 \pm$   
725  $12.5$  nm/s ( $n = 97$ ) and  $25.3 \pm 11.3$  nm/s ( $n = 122$ ), respectively. **e**, Typical FRAP  
726 measurement of FtsZ-GFP in a rectangular *E. coli* cell. Half of the rectangle was  
727 bleached. **f**, Average recovery times for FtsZ-mCitrine (light,  $n_{\text{tot}} = 24$ ) and FtsZ-GFP  
728 (dark,  $n_{\text{tot}} = 22$ ) in FtsZ-rectangles of various perimeter lengths (see [SI text](#) for detailed  
729 values). Scale bars =  $1 \mu\text{m}$ .

730

731

732

733

734

735

736

737

738

739

740



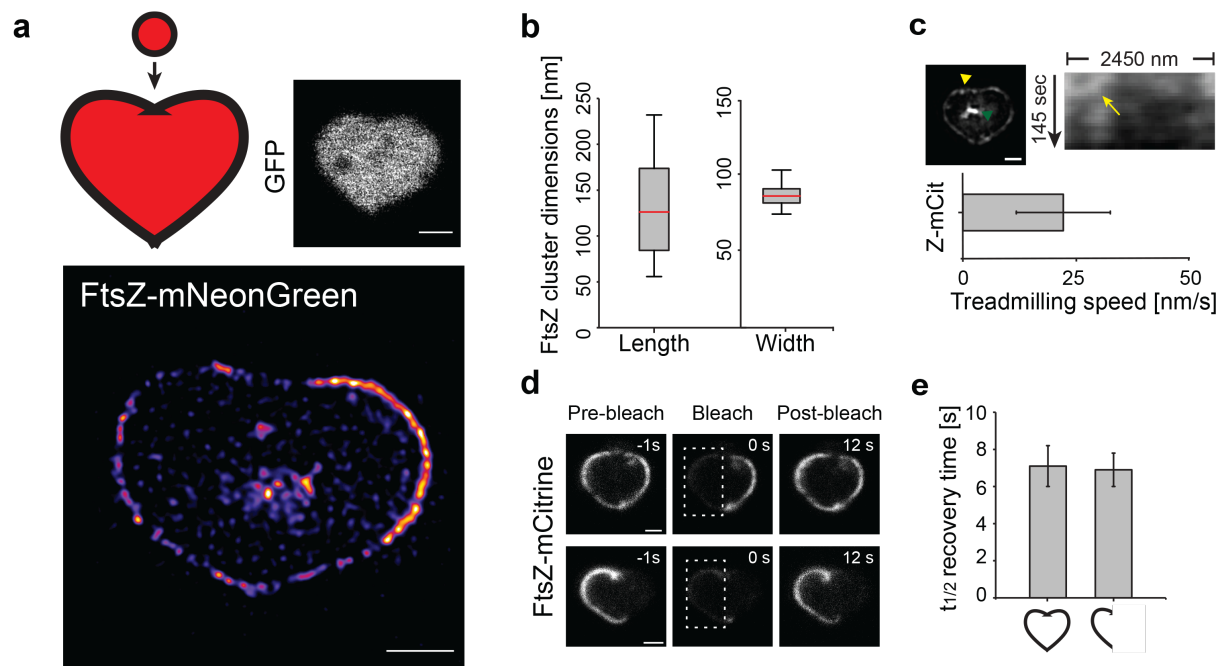

741

742 **Figure 5. FtsZ cluster dimensions and dynamics in heart-shaped cells.**

743 FtsZ behavior in *E. coli* cells sculptured into heart shapes. **a**, Upper left, Cartoon  
 744 representation of a WT *E. coli* cell and a heart shape, highlighting the large and  
 745 complex structural changes of a cell-to-heart transition, approximately to scale. Upper  
 746 right, Drug-treated cell expressing cytoplasmic GFP, shaped as a heart. Lower, STED  
 747 image of an “FtsZ-heart” (FtsZ-mNeonGreen) in a drug-treated *E. coli* cell. **b**, Lengths  
 748 and widths of 155 individual FtsZ-mNeonGreen fluorescence densities in cells shaped  
 749 as hearts. Average length =  $129 \pm 44$  nm and width =  $84 \pm 9$  nm. **c**, Upper row, SIM  
 750 image from a time-lapse series (epi-fluorescence) of a heart-shaped cell expressing  
 751 FtsZ-mCitrine. Green arrowhead indicates internal FtsZ clustering. Corresponding  
 752 kymograph is shown adjacent to the image, and was generated starting at the yellow  
 753 arrowhead in the SIM image, moving counter-clockwise for the indicated length. The  
 754 yellow arrow points to an FtsZ trajectory. Lower, average treadmilling speed of FtsZ-  
 755 mCitrine (Z-mCit) filaments in hearts ( $22.6 \pm 10.4$  nm/s,  $n = 44$ ). **d**, FRAP  
 756 measurements of FtsZ-mCitrine in heart-shaped cells. Top row, bleaching of half the  
 757 FtsZ-mCitrine molecules in a ‘full’ heart. Bottom row, bleaching of a ‘half-full’ heart. No

758 difference in recovery time was observed. **e**, Histogram of average  $t_{1/2}$  recovery times  
759 calculated from FRAP measurements. Recovery in 'full hearts':  $7.1 \pm 1.1$  s ( $n = 24$ ),  
760 recovery in 'half hearts':  $6.9 \pm 0.9$  s ( $n = 9$ ).

761

762

763

764

765

766

767

768

769

770

771

772

773

774

775

776

777

778

779

780

781

782

783

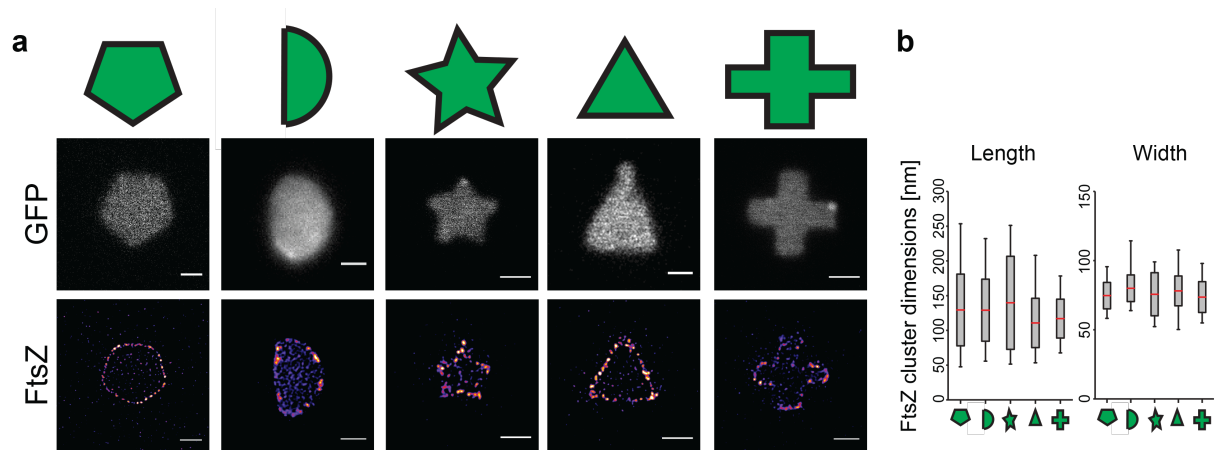

784

785

786 **Figure 6. FtsZ bundle dimensions in complex shapes.**

787 **a**, Cells expressing cytosolic GFP or FtsZ-mCitrine were remodeled into various  
788 shapes. Top row, schematic representation of the cell shapes. Middle row,  
789 representative cells expressing cytosolic GFP, and sculptured in the corresponding  
790 shapes. Bottom row, an FtsZ-pentagon, FtsZ-half-moon, FtsZ-star, FtsZ-triangle and  
791 FtsZ-cross in sculptured cells. Scale bars = 1  $\mu\text{m}$ . **b**, Quantification of FtsZ densities  
792 by length and width in shaped cells (see [SI text](#) for detailed values).

793

FtsZ density dimensions

| Cell shape | FP*  | Drugs <sup>§</sup> | Length[nm] | Width [nm] |
|------------|------|--------------------|------------|------------|
| ○ (WT)     | mNG  | —                  | 123 ± 44   | 80 ± 2     |
| ○          | mNG  | +                  | 132 ± 48   | 88 ± 9     |
| □          | mNG  | +                  | 105 ± 40   | 80 ± 18    |
| □          | mCit | +                  | 118 ± 41   | 86 ± 22    |
| ♥          | mNG  | +                  | 129 ± 44   | 84 ± 9     |
| ◡          | mNG  | +                  | 131 ± 52   | 74 ± 9     |
| ◐          | mNG  | +                  | 129 ± 45   | 80 ± 10    |
| ☆          | mNG  | +                  | 140 ± 67   | 76 ± 16    |
| ▲          | mNG  | +                  | 110 ± 35   | 78 ± 11    |
| +          | mNG  | +                  | 119 ± 21   | 71 ± 18    |

\* Fluorescent protein; mNG = mNeonGreen, mCit = mCitrine

§ Drugs; A22 [16 μM] and Cephalixin [20 μM]

794  
795

796 **Table 1. Summary of FtsZ density dimensions at midcell in various cell**

797 **shapes.** In all cell shapes, the average measured density lengths were within 17 %  
798 of WT, while average widths were within 13 %. Numbers represent mean ± S.D.

799 Note that values are rounded to whole integers.

800

801

802

803

804

### FtsZ Dynamics

| Cell shape | FP*  | Drugs <sup>§</sup> | Treadmilling speed [nm/s] | t <sub>1/2</sub> recovery [s] |
|------------|------|--------------------|---------------------------|-------------------------------|
| ○ (WT)     | GFP  | —                  | 26 ± 15                   | 8 ± 2                         |
| ○          | GFP  | +                  | 30 ± 18                   | 8 ± 2                         |
| □          | mCit | +                  | 28 ± 13                   | 10 ± 3                        |
| □          | GFP  | +                  | 25 ± 11                   | 9 ± 3                         |
| ♥          | mCit | +                  | 23 ± 10                   | 7 ± 1                         |

805

\* Fluorescent protein; mCit = mCitrine<sup>§</sup> Drugs; A22 [16 μM] and Cephalixin [20 μM]

806

807 **Table 2. Summary of FtsZ dynamics in various cell shapes.**

808 Numbers represent mean ± S.D. Note that values are rounded to whole integers.

809
